# Supplementary material for: Performance of the HAS‐BLED, ORBIT, and ATRIA Bleeding Risk Scores on a Cohort of 399 344 Hospitalized Patients With Atrial Fibrillation and Cancer: Data From the French National Hospital Discharge Database
Source: PubMed Central journal article supplement — J Am Heart Assoc. 2022 Dec 6;11(23):e026388. doi: 10.1161/JAHA.121.026388 (PMC9851457; doi:10.1161/jaha.121.026388), 2022-12-06
Supplement: JAH3-11-e026388-s001.pdf [file JAH3-11-e026388-s001.pdf]

## **SUPPLEMENTAL MATERIAL**

**Table S1. International Classification of Disease 10 (ICD-10) codes**

|                                                               |                                                                                                                     |
|---------------------------------------------------------------|---------------------------------------------------------------------------------------------------------------------|
| Comorbidity or medical history                                | Existing diagnoses                                                                                                  |
| AF management care                                            | I48                                                                                                                 |
| AF symptoms                                                   |                                                                                                                     |
| Tachycardia                                                   | R000                                                                                                                |
| Chest pain                                                    | R072, R073, R074                                                                                                    |
| Palpitations                                                  | R002                                                                                                                |
| Strokes                                                       |                                                                                                                     |
| Ischaemic stroke                                              | I63, I66, I67                                                                                                       |
| Stroke, unspecified                                           | I64                                                                                                                 |
| Haemorrhagic stroke                                           | I60–I62, I69                                                                                                        |
| Transient ischaemic attack                                    | G45                                                                                                                 |
| Systemic embolism                                             | I74.2–I74.9                                                                                                         |
| Haemorrhages                                                  |                                                                                                                     |
| Gastro-intestinal bleeding                                    | I850, I983, K226, K250-2-4-6, K260-2-4-6, K270-2-4-6, K280-2-4-6, K290, K625, K920-K922                             |
| Haemorrhagic stroke                                           | I610-I616, I618, I619, I629                                                                                         |
| Other haemorrhages and acute anemia post-haemorrhage          | I85.0, I98.3, K62.5, K92.2, D62                                                                                     |
| Intracranial bleeding                                         | I60-I62, S064-S066                                                                                                  |
| Other bleeding                                                | D62, D683, D698, D699, H113, H922, J942, K661, K762, R040-R042, R048, R049, R58, S271, T792                         |
| Other critical organ or site bleeding                         | H313, H356, H431, H450, I230, I312, I600-I609, I620, I621, M250, S064-S066, S260                                    |
| Blood Transfusion                                             | Z513                                                                                                                |
| Urogenital bleeding                                           | N020-N029, N421, N920-N924, N930, N938, N939, N950, R31                                                             |
| Ischaemic heart disease                                       | I20–I25                                                                                                             |
| Heart failure                                                 | I50, I110, I130, I132, I131, I139                                                                                   |
| Including dyspnoea                                            | R060                                                                                                                |
| Cardiac dysrhythmia                                           | I47, I490–I493                                                                                                      |
| Abnormal cardiac conduction                                   | I44, I45, I494, I495, Z450, Z950                                                                                    |
| Valvular disease                                              | I05–I091, I33–I39, Q22, Q23                                                                                         |
| Mitral stenosis                                               | I342, I050, I052, Q232                                                                                              |
| Hypertension                                                  | I10–I15                                                                                                             |
| Diabetes mellitus                                             | E10–E14                                                                                                             |
| Vascular diseases                                             |                                                                                                                     |
| Myocardial infarction                                         | I21, I252                                                                                                           |
| Peripheral arterial disease                                   | I70–I73                                                                                                             |
| Occlusions                                                    | I65, I77                                                                                                            |
| Obesity                                                       | E65–E66                                                                                                             |
| Abnormal renal function                                       | N17–N19 (+N28) codes for renal insufficiency, transplantation (Z940, T861) and dialysis (Z49, Z992), E102, I12, I13 |
| Liver disease                                                 | K70–K77, procedures for liver transplantation or resection                                                          |
| Dyslipidaemia                                                 | E78                                                                                                                 |
| Thyroid disease                                               | E00–E07                                                                                                             |
| Anaemia                                                       | D50–D64                                                                                                             |
| Platelet or coagulation defect                                | D65–D69                                                                                                             |
| Lung disease                                                  | J40–J70, J961                                                                                                       |
| Including emphysema and chronic obstructive pulmonary disease | J43, J44                                                                                                            |
| Alcohol-related diagnoses                                     | E244, F10, G312, G621, G721, I426, K292, K70, K860, O354, P043, Q860, T51, Y90, Y91, Z502, Z714                     |

|                                 |                                      |
|---------------------------------|--------------------------------------|
| Dementia                        | F00–F03                              |
| Accidental falls                | W00–W19, R26                         |
| Cancer within preceding 5 years | Entire C-series                      |
| Inflammatory diseases           | M05–M14, M45, M46, K50–K52, K81, K85 |
| Digestive conditions            | Entire K-series                      |
| Rheumatology                    | Entire M-series                      |
| Ophthalmology                   | Entire H-series                      |
| Pulmonology                     | Entire J-series                      |
|                                 |                                      |

**Table S2. Rate of medication at discharge for AF patients with cancer or no cancer. Data from the Echantillon Généraliste des Bénéficiaires, EGB (general sample of healthcare beneficiaries)**

|                                  | <b>Cancer</b><br>n= 3,977 | <b>No Cancer</b><br>n= 22,429 | <b>p value</b> | <b>All patients</b><br>n= 26,406 |
|----------------------------------|---------------------------|-------------------------------|----------------|----------------------------------|
| <b>Age, years</b>                | 75.0 ± 10.6               | 75.4 ± 12.4                   | 0.0253         | 75.4 ± 12.2                      |
| <b>Men, n (%)</b>                | 2,507 (63.0%)             | 11,316 (50.5%)                | <0.0001        | 13,823 (52.3%)                   |
| <b>ACE inhibitor or ARB</b>      | 1,171 (29.4%)             | 9,753 (43.5%)                 | <0.0001        | 10,924 (41.4%)                   |
| <b>Beta-blocker</b>              | 1,371 (34.5%)             | 10,349 (46.1%)                | <0.0001        | 11,720 (44.4%)                   |
| <b>Diuretic</b>                  | 1,197 (30.1%)             | 8,873 (39.6%)                 | <0.0001        | 10,070 (38.1%)                   |
| <b>K-sparing diuretics</b>       | 176 (4.4%)                | 1,496 (6.7%)                  | <0.0001        | 1,672 (6.3%)                     |
| <b>Calcium channel blocker</b>   | 604 (15.2%)               | 4,044 (18.0%)                 | <0.0001        | 4,648 (17.6%)                    |
| <b>Digoxin</b>                   | 229 (5.8%)                | 1,838 (8.2%)                  | <0.0001        | 2,067 (7.8%)                     |
| <b>Antiarrhythmic agents</b>     | 966 (24.3%)               | 7,110 (31.7%)                 | <0.0001        | 8,076 (30.6%)                    |
| <b>Amiodarone</b>                | 759 (19.1%)               | 5,513 (24.6%)                 | <0.0001        | 6,272 (23.8%)                    |
| <b>Vitamin K antagonist</b>      | 896 (22.5%)               | 8,091 (36.1%)                 | <0.0001        | 8,987 (34.0%)                    |
| <b>Direct oral anticoagulant</b> | 578 (14.5%)               | 4,537 (20.2%)                 | <0.0001        | 5,115 (19.4%)                    |
| <b>Dabigatran</b>                | 84 (2.1%)                 | 811 (3.6%)                    | <0.0001        | 895 (3.4%)                       |
| <b>Rivaroxaban</b>               | 219 (5.5%)                | 1,960 (8.7%)                  | <0.0001        | 2,179 (8.3%)                     |
| <b>Apixaban</b>                  | 282 (7.1%)                | 1,828 (8.2%)                  | 0.0232         | 2,110 (8.0%)                     |
| <b>Aspirin</b>                   | 749 (18.8%)               | 5,314 (23.7%)                 | <0.0001        | 6,063 (23.0%)                    |
| <b>P2Y12 inhibitor</b>           | 179 (4.5%)                | 1,473 (6.6%)                  | <0.0001        | 1,652 (6.3%)                     |

Use of medication was identified in a 1/97 permanent random sample from the French nationwide claims database (Echantillon Généraliste de Bénéficiaires, EGB) with ICD-10 code of AF (I48).

**Table S3. Incidence rates of different bleeding types according to cancer site**

|                       | <b>Any bleeding</b> | <b>Gastrointestinal bleeding</b> | <b>Major bleeding</b> | <b>ICH</b>       |
|-----------------------|---------------------|----------------------------------|-----------------------|------------------|
| <b>Cancer overall</b> | 25.60 (25.46-25.75) | 3.61 (3.56-3.67)                 | 8.41 (8.33-8.49)      | 1.33 (1.30-1.36) |
| <b>Breast</b>         | 16.05 (15.71-16.40) | 2.67 (2.53-2.80)                 | 5.53 (5.33-5.73)      | 1.30 (1.21-1.40) |
| <b>Ovarian</b>        | 29.39 (27.84-31.02) | 3.67 (3.18-4.23)                 | 8.63 (7.82-9.52)      | 0.87 (0.65-1.16) |
| <b>Uterine</b>        | 38.25 (36.96-39.59) | 3.80 (3.43-4.21)                 | 8.97 (8.37-9.61)      | 1.05 (0.87-1.27) |
| <b>Prostatic</b>      | 27.29 (26.94-27.65) | 3.96 (3.83-4.08)                 | 9.12 (8.93-9.32)      | 1.37 (1.30-1.45) |
| <b>Renal</b>          | 31.14 (30.31-32.00) | 3.49 (3.24-3.77)                 | 9.58 (9.13-10.05)     | 1.48 (1.32-1.66) |
| <b>Bladder</b>        | 40.78 (40.16-41.40) | 3.45 (3.29-3.62)                 | 11.67 (11.36-11.99)   | 1.21 (1.12-1.31) |
| <b>Gastric</b>        | 40.69 (39.35-42.08) | 5.51 (5.06-6.00)                 | 11.01 (10.33-11.73)   | 0.91 (0.74-1.12) |
| <b>Colorectal</b>     | 27.36 (26.99-27.73) | 3.92 (3.79-4.06)                 | 8.35 (8.15-8.56)      | 1.10 (1.03-1.17) |
| <b>Liver</b>          | 44.64 (43.13-46.19) | 7.53 (6.96-8.15)                 | 12.68 (11.90-13.51)   | 1.45 (1.22-1.73) |
| <b>Pancreas</b>       | 41.30 (39.65-43.01) | 7.42 (6.78-8.12)                 | 11.71 (10.87-12.63)   | 1.41 (1.15-1.73) |
| <b>Lung</b>           | 32.78 (32.23-33.34) | 3.22 (3.06-3.39)                 | 8.17 (7.91-8.45)      | 0.98 (0.89-1.08) |
| <b>Lymphoma</b>       | 23.30 (22.67-23.94) | 3.35 (3.13-3.58)                 | 8.72 (8.35-9.11)      | 1.45 (1.31-1.61) |
| <b>Leukaemia</b>      | 31.01 (30.26-31.79) | 4.05 (3.80-4.31)                 | 12.39 (11.93-12.88)   | 1.89 (1.72-2.07) |
| <b>Myeloma</b>        | 27.60 (26.76-28.45) | 4.00 (3.71-4.31)                 | 11.64 (11.11-12.19)   | 1.52 (1.35-1.71) |
| <b>Metastatic</b>     | 40.24 (39.78-40.71) | 4.58 (4.43-4.73)                 | 10.38 (10.15-10.61)   | 1.33 (1.25-1.41) |
